# Supplementary material for: Electrolyte pH-dependent hydrogen binding energies and coverages on platinum, iridium, rhodium, and ruthenium surfaces
Source: Royal Society of Chemistry journal article supplement (doi:10.1039/d2cy00385f), 2022-01-01
Supplement: d2cy00385f1.pdf [file d2cy00385f1.pdf]

## **Electrolyte pH-Dependent Hydrogen Binding Energies and Coverages on Platinum, Iridium, Rhodium, and Ruthenium Surfaces**

*Shangqian Zhu<sup>1</sup> and Minhua Shao<sup>1,2,\*</sup>*

<sup>1</sup>Department of Chemical and Biological Engineering, The Hong Kong University of Science and Technology, Clear Water Bay, Kowloon, Hong Kong, China

<sup>2</sup>Energy Institute, Chinese National Engineering Research Center for Control & Treatment of Heavy Metal Pollution, The Hong Kong University of Science and Technology, Clear Water Bay, Kowloon, Hong Kong, China

\*Corresponding Author: kemshao@ust.hk

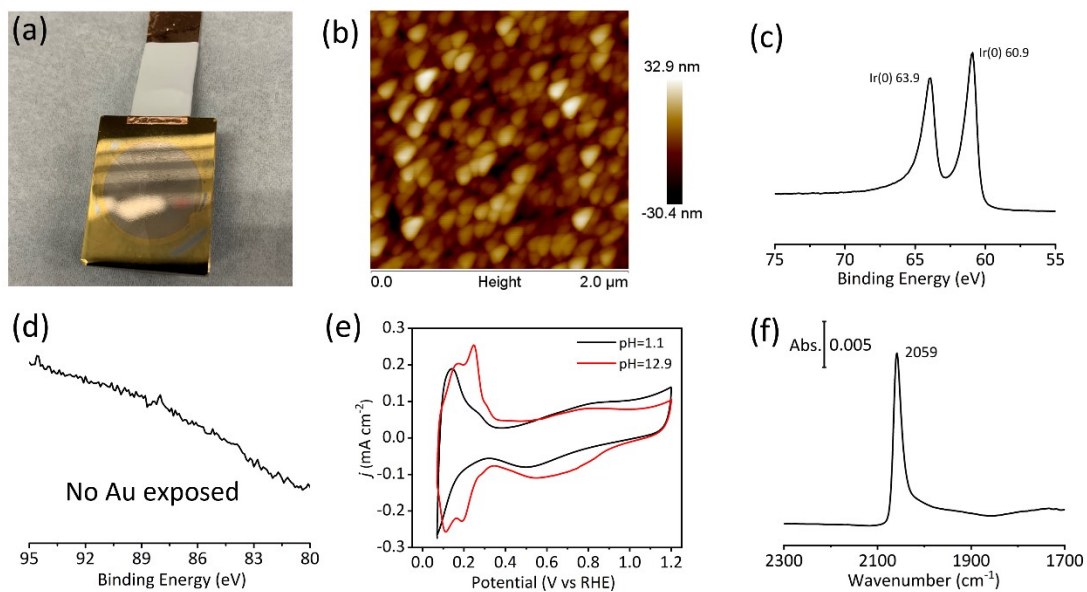

**Figure S1.** a) A photo, b) AFM characterization, c) Ir 4f and d) Au 4f XPS spectra, e) CVs, and f) CO adsorption spectrum collected at 0.1 V in a 0.1 M  $\text{HClO}_4$  solution of the Ir thin film.

**Table S1.**  $\text{H}_{\text{atop}}$  coverage ratio (alkaline/acidic media)

|                                         | Ir   | Rh    | Ru    | Pt <sup>a</sup> |
|-----------------------------------------|------|-------|-------|-----------------|
| $\text{H}_{\text{atop}}$ coverage ratio | 224% | 1386% | 1800% | 193%            |

<sup>a</sup> Data obtained from reference.<sup>25</sup> For Ir and Pt, the ratios were compared at 0 V vs RHE.

Spectra at -0.1 V vs RHE were used for comparison on Rh and Ru.
